# Supplementary material for: Dual modification of Ti3C2Tx MXene hybridization and cut-off voltage adjustment for MoS2 to achieve stable sodium storage performance
Source: Royal Society of Chemistry journal article supplement (doi:10.1039/d2qm01248k), 2023-01-01
Supplement: d2qm01248k1.pdf [file d2qm01248k1.pdf]

## Supporting Information

### **Dual Modification of $Ti_3C_2T_x$ MXene Hybridization and Cut-off Voltage Adjustment for $MoS_2$ to Achieve Stable Sodium Storage Performance**

Jiabao Li<sup>a\*</sup>, Shaocong Tang<sup>a</sup>, Quan Yuan<sup>a</sup>, Jingjing Hao<sup>a</sup>, Ziqian Li<sup>a</sup>, Tianyi Wang<sup>a</sup>,  
Chengyin Wang<sup>a\*</sup>, Likun Pan<sup>b\*</sup>

*<sup>a</sup>School of Chemistry and Chemical Engineering, Yangzhou University, 180 Si-Wang-Ting Road, Yangzhou, Jiangsu 225002, China*

*<sup>b</sup>Shanghai key laboratory of Magnetic Resonance, School of Physics and Electronic Science, East China Normal University, Shanghai 200062, China*

*\*Corresponding author: [jiabaoli@yzu.edu.cn](mailto:jiabaoli@yzu.edu.cn) (Jiabao Li); [wangcy@yzu.edu.cn](mailto:wangcy@yzu.edu.cn)*

*(Chengyin Wang); [lkpan@phy.ecnu.edu.cn](mailto:lkpan@phy.ecnu.edu.cn) (Likun Pan)*

## **Material Characterization**

The morphology and structure investigation for the  $\text{MoS}_2/\text{Ti}_3\text{C}_2\text{T}_x$  and  $\text{Ti}_3\text{C}_2\text{T}_x$  was conducted by field-emission scanning electron microscopy (Zeiss\_Supra55) and transmission electron microscopy (Tecnai 12). The phase structures of as-prepared samples were determined by X-ray diffraction patterns with D8 ADVANCE using  $\text{Cu K}\alpha$  radiation source ( $\lambda = 1.54056 \text{ \AA}$ ). Raman spectra was collected by RM-1000 (Renishaw In Via). The surface chemical components of obtained samples were detected through the X-ray photoelectron spectroscopy measurements (ESCALAB 250Xi).

## **Electrochemical Measurement**

For the fabrication of working electrode, desired  $\text{MoS}_2/\text{Ti}_3\text{C}_2\text{T}_x$ , conductive agent (Super P), and binder (carboxymethyl cellulose) with a mass ratio of 8:1:1 was dispersed into deionized water and further ground to form a uniform slurry, which was then coated on a clean copper foil and vacuum dried at  $100 \text{ }^\circ\text{C}$  overnight. In regard to the cell assembly, sodium foil and Whatman glass fiber were employed as the counter electrode and separator, separately. The electrolyte employed is  $1.0 \text{ M NaPF}_6$  in ethylene carbonate/diethyl carbonate (EC/DEC). The electrochemical tests were conducted on the LAND 2001A battery test system, and the cyclic voltammetry measurements were conducted on an electrochemical workstation (CHI 660B), and the electrochemical impedance spectra were also collected from the same workstation from  $0.1 \text{ Hz}$  to  $1000 \text{ kHz}$ .

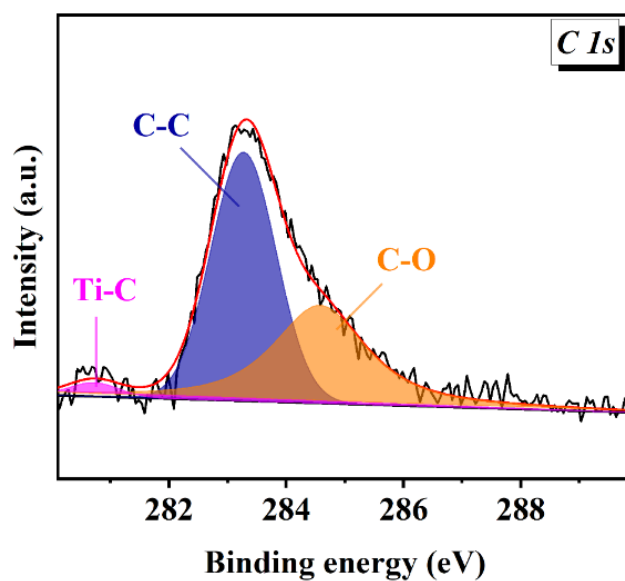

Fig. S1 High-resolution Ti 2p spectra of MoS<sub>2</sub>/Ti<sub>3</sub>C<sub>2</sub>T<sub>x</sub>.

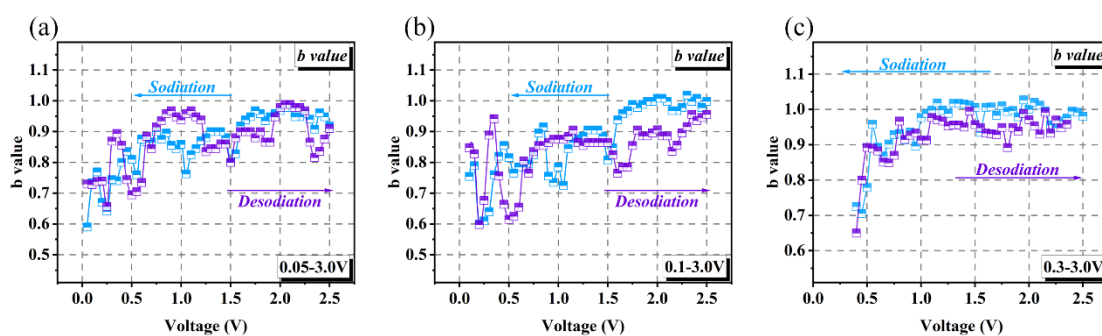

Fig. S2 The variation of b values upon discharging and charging of MoS<sub>2</sub>/Ti<sub>3</sub>C<sub>2</sub>T<sub>x</sub> with the discharge cut-off voltage of 0.05 V (a), 0.1 V (b), and 0.3 V (c).

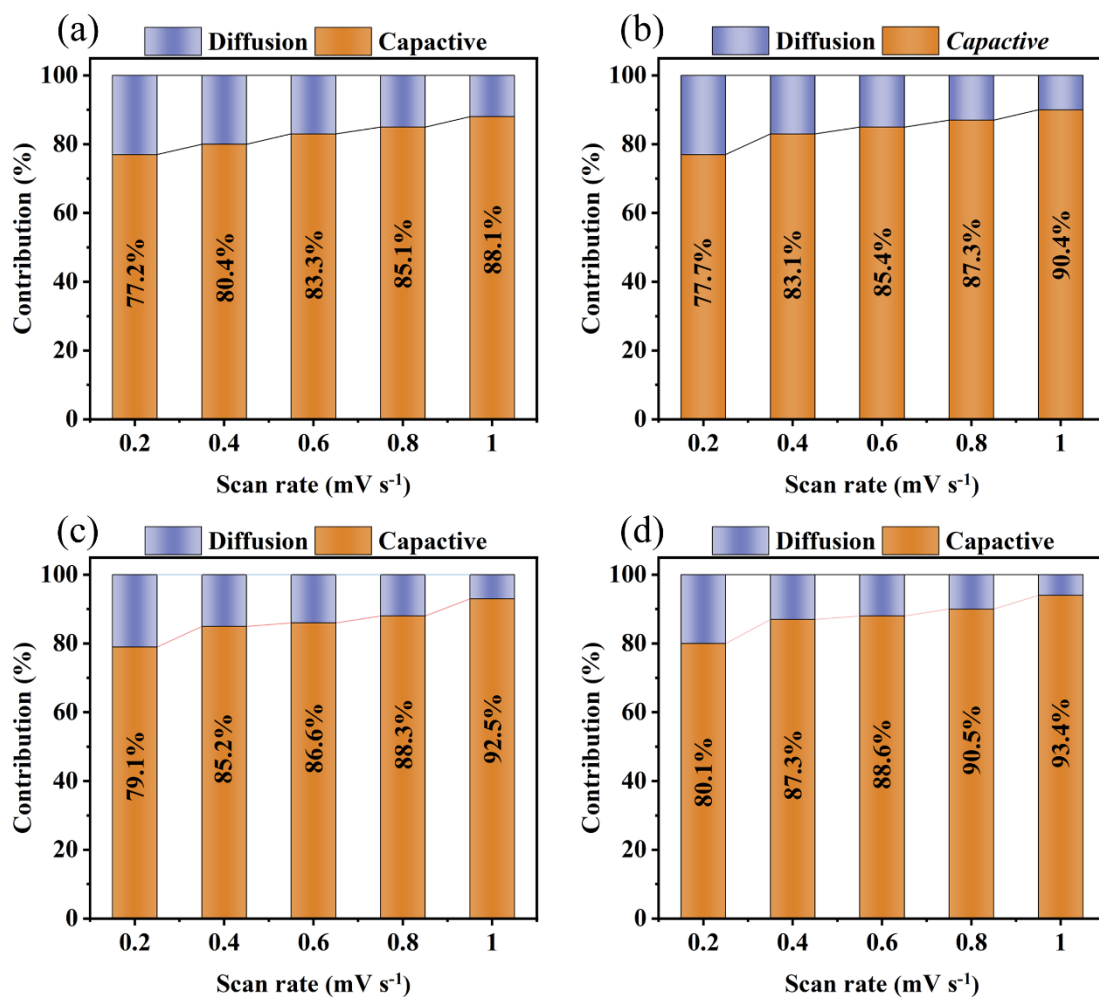

Fig. S3 Charge contributions from diffusion and pseudocapacitive effect of MoS<sub>2</sub>/Ti<sub>3</sub>C<sub>2</sub>T<sub>x</sub> with the discharge cut-off voltage of 0.05 V (a), 0.1V (b), 0.2V (c), and 0.3 V (d).

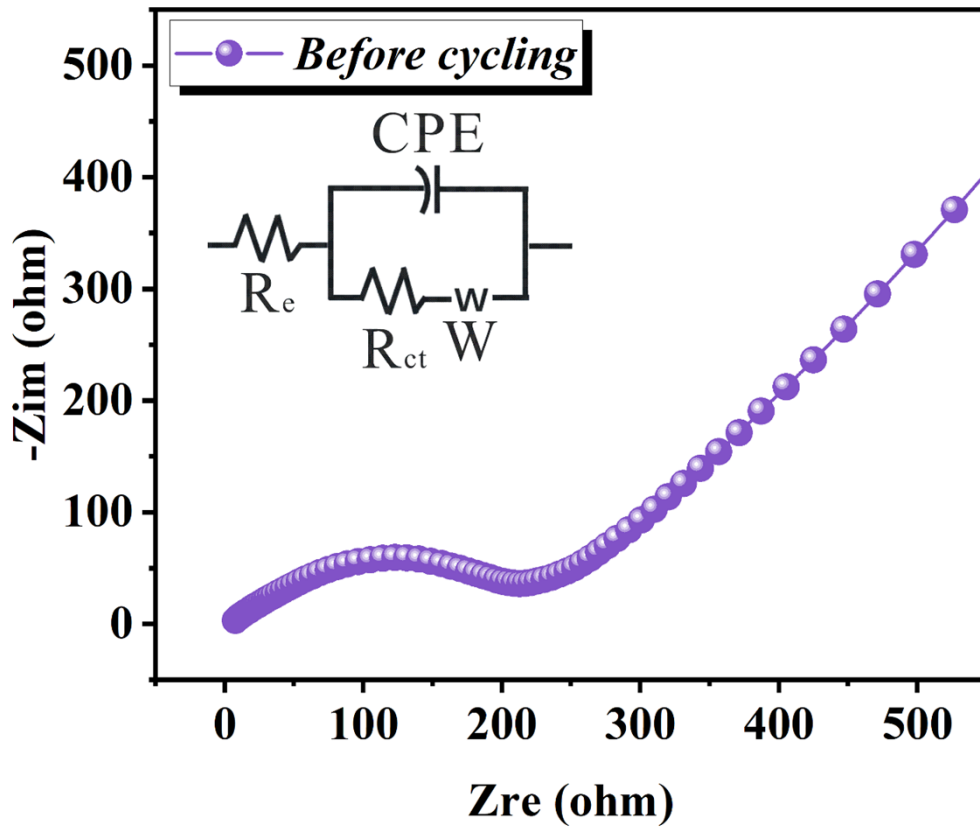

Fig. S4 Nyquist plot of the MoS<sub>2</sub>/Ti<sub>3</sub>C<sub>2</sub>T<sub>x</sub> electrode before cycling (insert is the corresponding equivalent circuit model).

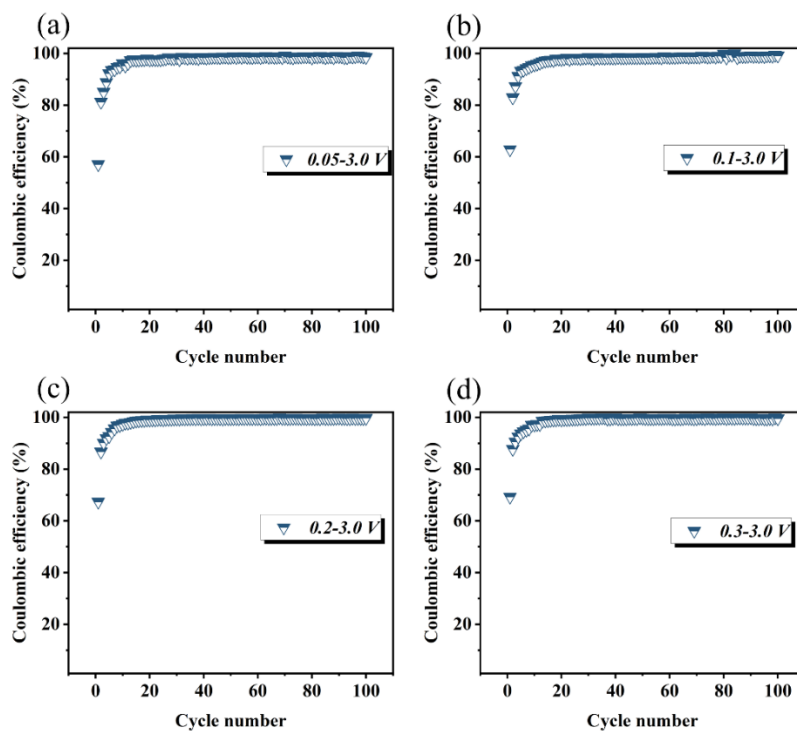

Fig. S5 The Coulombic efficiencies of  $\text{MoS}_2/\text{Ti}_3\text{C}_2\text{T}_x$  with the discharge cut-off voltage of 0.05 V (a), 0.1V (b), 0.2 V (c), and 0.3 V (d).

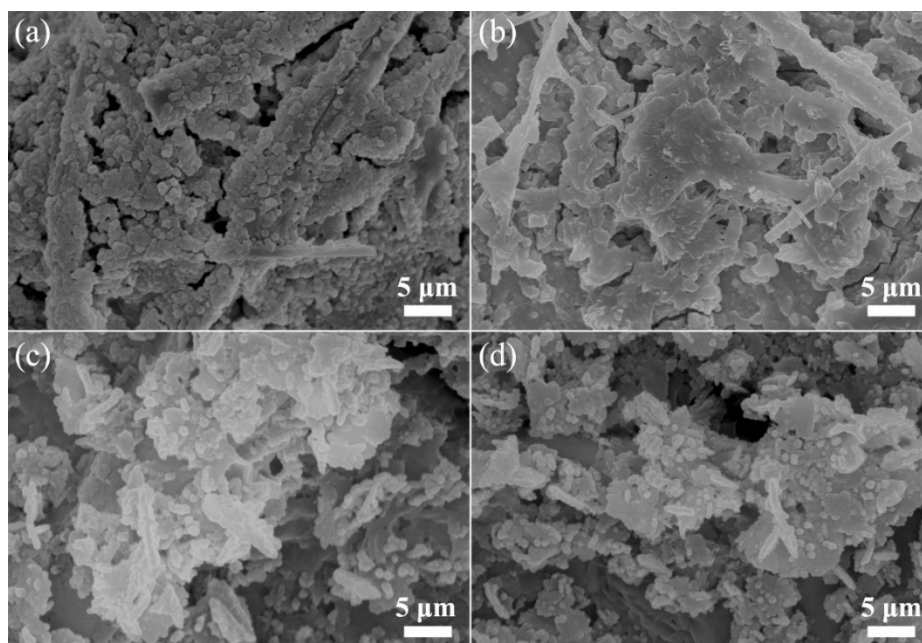

Fig. S6. FESEM images of  $\text{MoS}_2/\text{Ti}_3\text{C}_2\text{T}_x$  electrode after 10 cycles at  $0.5 \text{ A g}^{-1}$  with the discharge cut-off voltages of 0.05 (a), 0.1 (b), 0.2 (c) and 0.3 V (d).

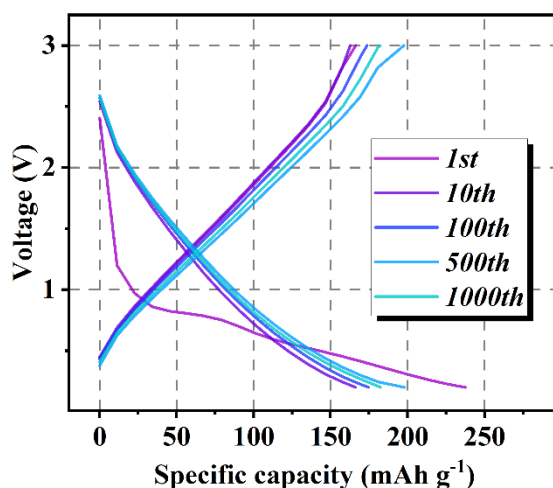

Fig. S7 Rate profiles of MoS<sub>2</sub>/Ti<sub>3</sub>C<sub>2</sub>T<sub>x</sub> with the discharge cut-off voltage of 0.2 V.

Table S1 The comparison of electrochemical performance of the as-prepared MoS<sub>2</sub>/Ti<sub>3</sub>C<sub>2</sub>T<sub>x</sub> with optimized voltage window and other related studies focused on the modification of voltage window.

| Samples                                                            | Voltage range (V) | Cycling performance                                                      | Rate capability                                                                                                                                                                                                                                                                                                                                                       | Ref. |
|--------------------------------------------------------------------|-------------------|--------------------------------------------------------------------------|-----------------------------------------------------------------------------------------------------------------------------------------------------------------------------------------------------------------------------------------------------------------------------------------------------------------------------------------------------------------------|------|
| WS <sub>2</sub> nano-plates (ester-based electrolyte)              | 0.01-2.0          | About 241.6 mAh g <sup>-1</sup> after 50 cycles at 0.1 A g <sup>-1</sup> | About 351.8 mAh g <sup>-1</sup> at 0.05 A g <sup>-1</sup><br>About 301.7 mAh g <sup>-1</sup> at 0.1 A g <sup>-1</sup><br>About 296.2 mAh g <sup>-1</sup> at 0.2 A g <sup>-1</sup><br>About 256.2 mAh g <sup>-1</sup> at 0.5 A g <sup>-1</sup><br>About 206.6 mAh g <sup>-1</sup> at 1.0 A g <sup>-1</sup><br>About 181.5 mAh g <sup>-1</sup> at 2.0 A g <sup>-1</sup> | 1    |
| MoS <sub>2</sub> @reduced graphene oxide (ester-based electrolyte) | 0.4-3             | 137.4 mAh g <sup>-1</sup> after 1000 cycles at 0.5 A g <sup>-1</sup>     | /                                                                                                                                                                                                                                                                                                                                                                     | 2    |

|                                                                                                             |        |                                                                           |                                                                                                                                                                                                                                                                                                                                                                       |           |
|-------------------------------------------------------------------------------------------------------------|--------|---------------------------------------------------------------------------|-----------------------------------------------------------------------------------------------------------------------------------------------------------------------------------------------------------------------------------------------------------------------------------------------------------------------------------------------------------------------|-----------|
| FG-MoS <sub>2</sub><br>(ester-based electrolyte)                                                            | 0.4-3  | 295.0 mAh g <sup>-1</sup><br>after 300 cycles at<br>0.2 A g <sup>-1</sup> | About 208.2 mAh g <sup>-1</sup> at 0.2 A g <sup>-1</sup><br>About 200.3 mAh g <sup>-1</sup> at 1.0 A g <sup>-1</sup><br>About 199.3 mAh g <sup>-1</sup> at 3.0 A g <sup>-1</sup><br>About 188.6 mAh g <sup>-1</sup> at 6.0 A g <sup>-1</sup><br>About 179.1 mAh g <sup>-1</sup> at 8.0 A g <sup>-1</sup><br>About 175.1 mAh g <sup>-1</sup> at 10.0 A g <sup>-1</sup> | 3         |
| MoS <sub>2</sub> decorated<br>on Ti <sub>3</sub> C <sub>2</sub> T <sub>x</sub><br>(ester-based electrolyte) | 0.01-3 | 250.9 mAh g <sup>-1</sup><br>after 100 cycles at<br>0.1 A g <sup>-1</sup> | 392.6 mAh g <sup>-1</sup> at<br>0.05 A g <sup>-1</sup><br>285.4 mAh g <sup>-1</sup> at<br>0.1 A g <sup>-1</sup><br>245.6 mAh g <sup>-1</sup> at<br>0.2 A g <sup>-1</sup><br>207.2 mAh g <sup>-1</sup> at<br>0.5 A g <sup>-1</sup><br>162.7 mAh g <sup>-1</sup> at<br>1.0 A g <sup>-1</sup>                                                                            | 4         |
| MoS <sub>2</sub> /Ti <sub>3</sub> C <sub>2</sub> T <sub>x</sub><br>(ester-based electrolyte)                | 0.2-3  | 258.2 mAh g <sup>-1</sup><br>after 100 cycles at<br>0.1 A g <sup>-1</sup> | 256.3 mAh g <sup>-1</sup> at<br>0.1 A g <sup>-1</sup><br>206.2 mAh g <sup>-1</sup> at<br>0.5 A g <sup>-1</sup><br>173.3 mAh g <sup>-1</sup> at<br>1.0 A g <sup>-1</sup><br>159.4 mAh g <sup>-1</sup> at<br>3.0 A g <sup>-1</sup><br>149.0 mAh g <sup>-1</sup> at<br>5.0 A g <sup>-1</sup>                                                                             | This work |

## Reference

1. X. Zhang, K. Liu, S. Zhang, F. Miao, W. Xiao, Y. Shen, P. Zhang, Z. Wang and G. Shao, WS<sub>2</sub> anode in Na and K-ion battery: effect of upper cut-off potential on electrochemical performance, *Electrochim. Acta*, 2021, **38**, 138339.
2. X. Zhang, K. Liu, S. Zhang, F. Miao, W. Xiao, Y. Shen, P. Zhang, Z. Wang and G. Shao, Enabling



remarkable cycling performance of high-loading MoS<sub>2</sub>@Graphene anode for sodium ion batteries with tunable cut-off voltage, *J. Power Source*, 2020, **458**, 228040.

3. Z. Hu, L. Wang, K. Zhang, J. Wang, F. Cheng, Z. Tao and J. Chen, MoS<sub>2</sub> Nanoflowers with Expanded Interlayers as High-Performance Anodes for Sodium-Ion Batteries, *Angew. Chem. Int. Ed.*, 2014, **53**, 12794-12798.
4. Y. Wu, P. Nie, J. Jiang, B. Ding, H. Dou and X. Zhang, MoS<sub>2</sub> nanosheets Decorated 2D Titanium Carbide (MXene) as high-performance Anodes for Sodium-ion Batteries, *ChemElectroChem*, 2017, 4(6), 1560-1565.
